# Supplementary material for: Asymmetrically coated LAGP/PP/PVDF–HFP composite separator film and its effect on the improvement of NCM battery performance
Source: Royal Society of Chemistry journal article supplement (doi:10.1039/c9ra09200e), 2019-01-01
Supplement: c9ra09200e1.pdf [file c9ra09200e1.pdf]

## Supporting Information

**Journal name:** RSC Advances

**Title:** Asymmetrically coated LAGP/PP/PVDF-HFP composite separator film and its effect on the improvement of NCM battery performance

**Authors:** Tian Liang,<sup>a,b</sup> Jianhua Cao,<sup>a</sup> Weihua Liang,<sup>a</sup> Quan Li,<sup>b,c</sup> Lei He<sup>a,b</sup> and Dayong Wu<sup>\*a</sup>

**Author affiliations:**

<sup>a</sup> *Technical Institute of Physics and Chemistry, Chinese Academy of Science, 29 zhongguancun east road, Haidian District, Beijing 100190, P. R. China*

<sup>b</sup> *University of Chinese Academy of Science, Beijing 100049, P. R. China*

<sup>c</sup> *Beijing National Laboratory for Condensed Matter Physics, Institute of Physics, Chinese Academy of Science, Beijing 100190, P. R. China*

\*Corresponding author: dayongwu@mail.ipc.ac.cn

## **Method**

### **Preparation of Inorganic Ion Conductor, LAGP**

Firstly,  $\text{Li}_2\text{CO}_3$  (11.60 g),  $\text{Al}(\text{OH})_3$  (7.80 g),  $\text{NH}_4\text{H}_2\text{PO}_4$  (69.00 g),  $\text{GeO}_2$  (31.38 g), ethanol (35 mL) were thoroughly mixed by the planetary ball milling for 12 h. The ratio between balls and material was 1.1:1 (mass ratio). Then, the well-mixed sample was placed in an alumina crucible, and pre-sintered at 700 °C for 2 h in a tube furnace. After cooling to room temperature, the calcined product was subjected to mash grinding for 20 min (80 rpm), and treated in a tube furnace for 2 h at 900 °C. Finally, the agglomerated LAGP material was collected at room temperature.

The LAGP prepared above was sequentially treated with jaw crusher (30 Hz), mortar grinder (80 rpm, 20 min), and ball-milling. The weight ratio of grinding media to material was 2:1. The ball milling time was 3 h. The obtained powder was sieved with a 150 mesh vibrating sieve. The sieved powder was dried at 70°C for 12 h under vacuum.

### **Additives used in LAGP slurry**

10.4 g of additives including 1.8 g of plasticizer dibutyl phthalate (DBP), 1.8 g of coupling agent  $\gamma$ -glycidoxypropyltrimethoxysilane (KH560), 5.4 g of dispersant BYK111 and 1.4 g of wetting agent BYK307 was added into 1408 g of LAGP slurry and dispersed thoroughly.

### **Additives used in PVDF-HFP Aqueous Slurry**

94.5 g of additives including 9.0 g of aqueous anti-settling agent LAPONITE RD, 60.0 g of aqueous dispersant BYK-LPC 22136, 10.5 g of aqueous wetting agent

BYK-LPX 20990 and 15.0 g of aqueous defoamer BYK-1785 was added into 1458 g of PVDF-HFP slurry.

### **Ball milling treatment**

The program was set as: forward for 5 min and reverse for 5 min at a speed of 200 rpm for 12 h. And an intermittent was set between every forward and reverse rotation for 3 min.

### **Measurement**

The melting point of three separators was measured using a differential scanning calorimeter (DSC, Mettler with a heating rate of 10 °C min<sup>-1</sup> from 50 °C to 250 °C), and the results are shown in Fig. S1. The thermal decomposition temperature ( $T_d$ ) data was obtained using a thermogravimetric analyzer (Fig. S2) with a heating rate of 10 °C min<sup>-1</sup> from 25 °C to 700 °C. The impedance of three types of separators was determined on an electrochemical workstation system (Fig. S3).

The grounded LAGP powder was pressed into pellet (thickness: 1 mm, diameter: 13mm) under the pressure of 20 MPa. The soaked LAGP pellet with a mixture of ethylene carbonate/dimethyl carbonate/diethyl carbonate (1:1:1, w/w/w) was sandwiched between two stainless-steel blocking electrodes to form the test cells. The ionic conductivity of the LAGP pellet was measured by electrochemical workstation system (Zennium 6, Germany) with an AC amplitude of 5 mV in the frequency range of 0.1 Hz -1 MHz. The Nyquist plot of LAGP pellet was shown in Fig. S4.

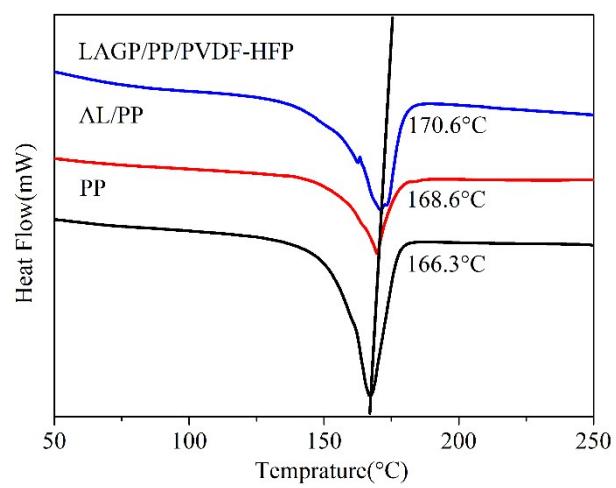

Fig. S1 DSC curves of PP, AL/PP, LAGP/PP/PVDF-HFP separator films.

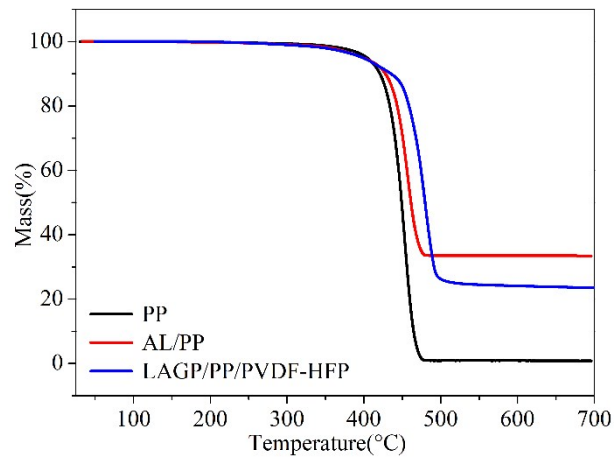

Fig. S2 TGA curves of PP, AL/PP, LAGP/PP/PVDF-HFP separator films.

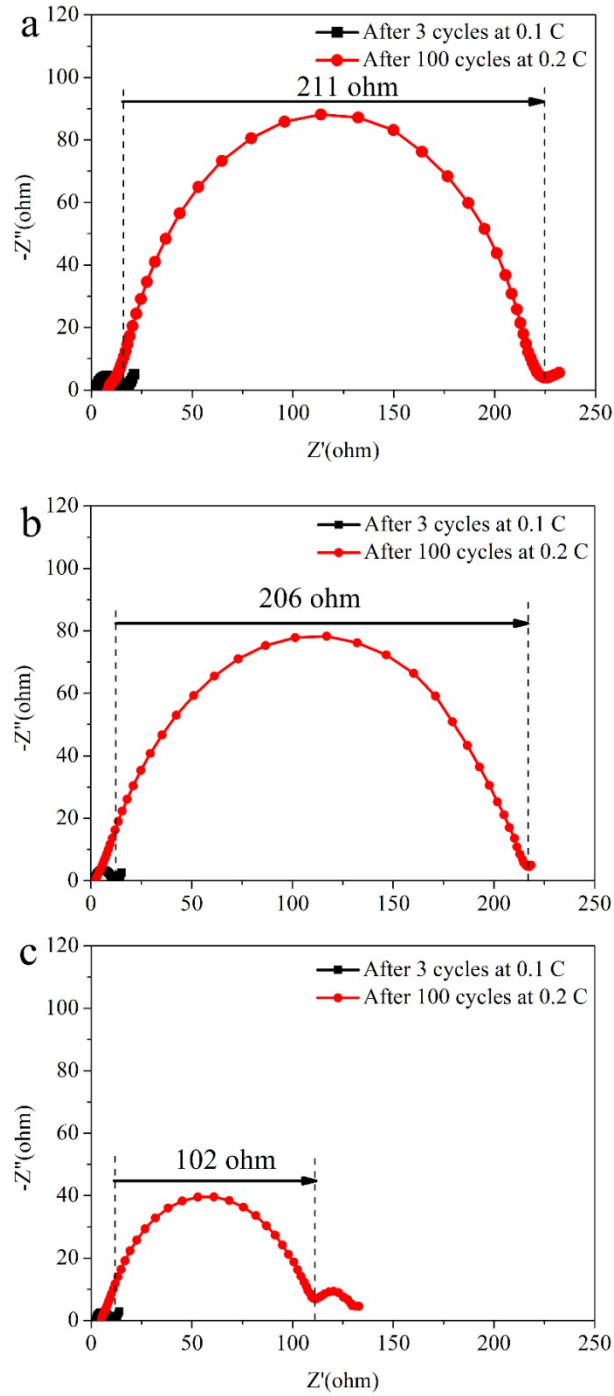

Fig. S3 Variations of the impedance spectra of NCM811|separator|Li half-cells before and after 100 cycles at 0.2 C a) PP, b) AL/PP, c) LAGP/PP/PVDF-HFP separator film.

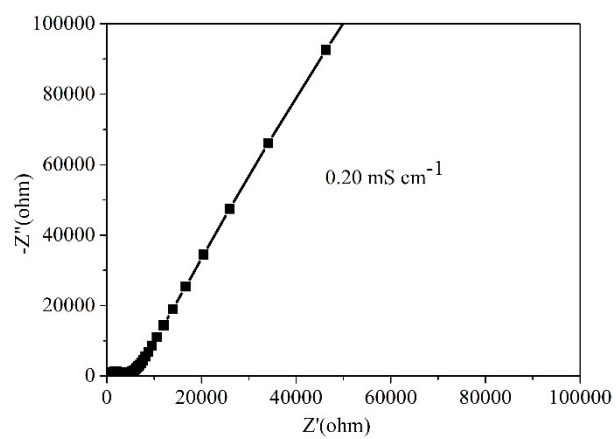

Fig. S4 Nyquist plot of LAGP pellet.

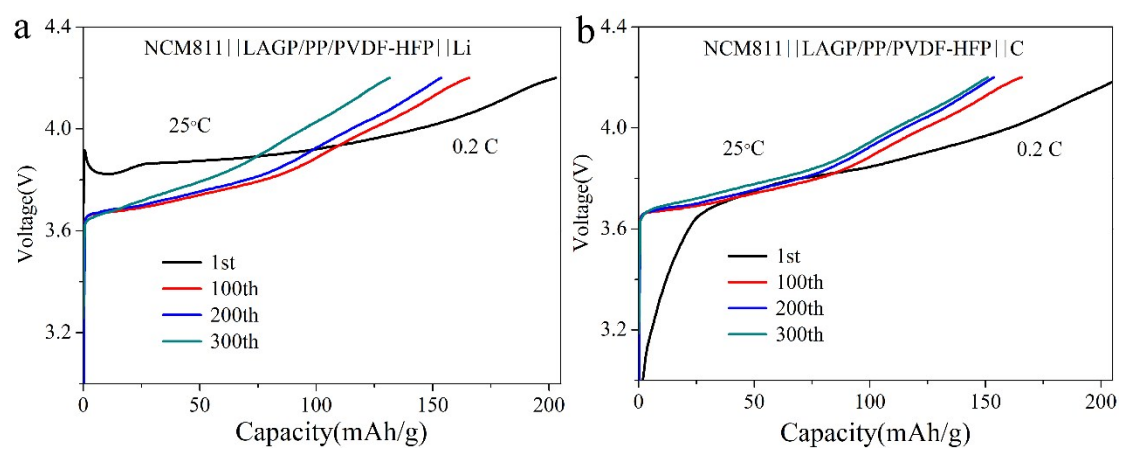

Fig. S5 Charge profiles of (a) NCM811||Li cell with LAGP/PP/PVDF-HFP separator film; (b) NCM811||C cell with LAGP/PP/PVDF-HFP separator film.
